# Supplementary material for: Functional Traits for Carbon Access in Macrophytes
Source: PLOS journal article supplement (doi:10.1371/journal.pone.0159062), 2016-07-14
Supplement: S1 (10.1371/journal.pone.0159062.s001) [file journal.pone.0159062.s001]

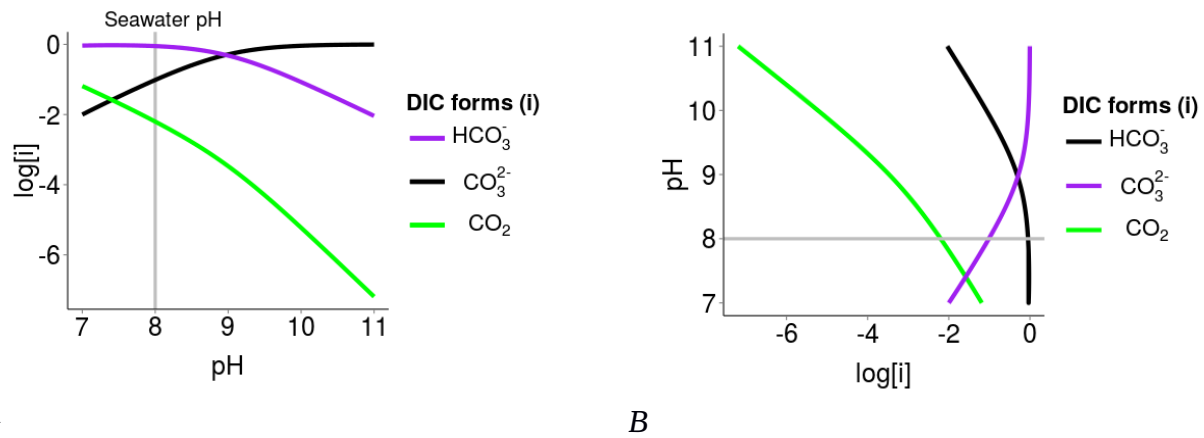

**S1 Figure. Dissolved inorganic carbon proportions relative to pH.** A) Log of  $[\text{HCO}_3^-]$ ,  $[\text{CO}_3^{2-}]$  and  $[\text{CO}_2]$  as a function of pH. Grey line indicates concentrations at control seawater pH. While pH is an emergent property of dissolved inorganic carbon concentrations (B), it is often depicted on the x axis, as these values are somewhat interdependent.
